# Supplementary material for: Non-redundant activity of GSK-3α and GSK-3β in T cell-mediated tumor rejection
Source: PubMed Central journal article supplement (PMC8188550; doi:10.1016/j.isci.2021.102555), 2021-05-19
Supplement: mmc1.pdf [file mmc1.pdf]

**iScience, Volume 24**

**Supplemental information**

**Non-redundant activity of GSK-3 $\alpha$  and GSK-3 $\beta$   
in T cell-mediated tumor rejection**

**Lynette Steele, Aarren J. Mannion, Gary Shaw, Kenneth A. MacLennan, Graham P. Cook, Christopher E. Rudd, and Alison Taylor**

**Figure S1. Tumour rejection in *Gsk-3b* cKO is associated with higher numbers of CD4+ T cells and increased FoxP3 expression, related to Figure 6.**

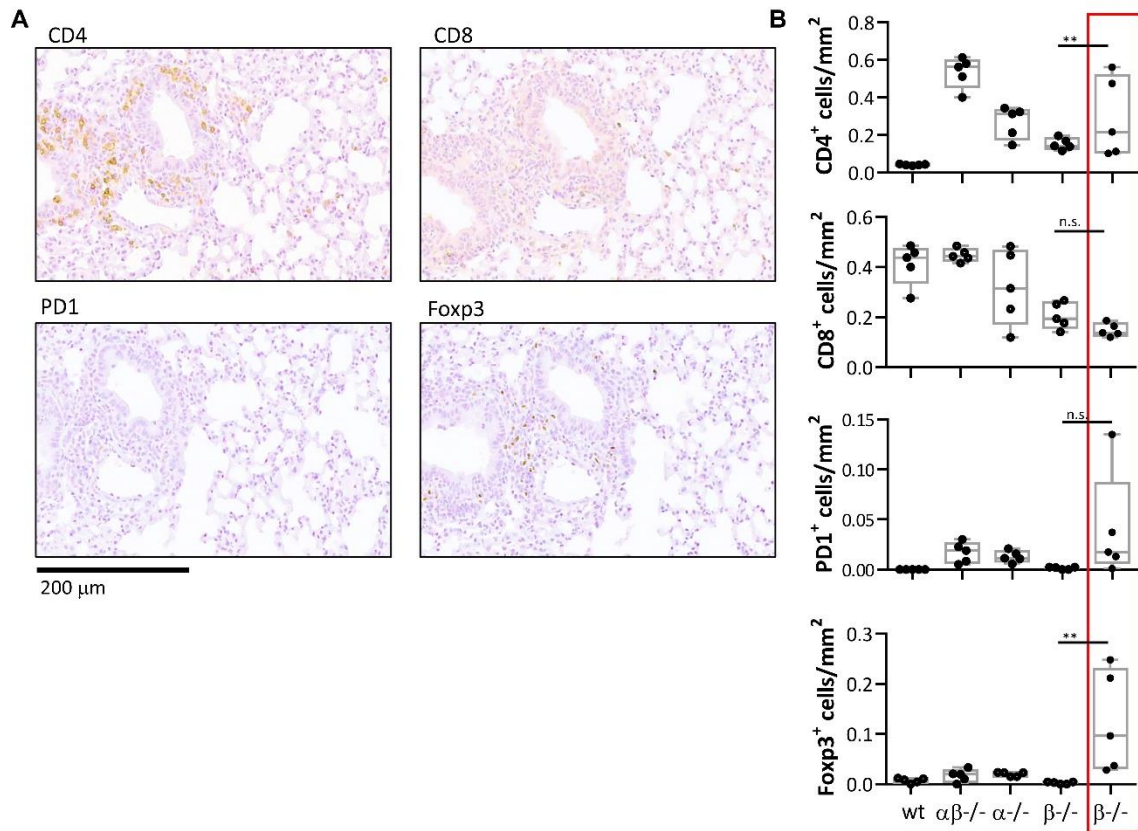

Immunohistochemistry of lung tissue sections from a *Gsk3b* cKO mouse following B16 tumour cell rejection. **(A)** Sections demonstrating CD4, CD8, PD1 and FOXP3 expression. **(B)** The number of positive cells were quantified from 5 different areas using ImageScope Software
